# Supplementary material
Source: PubMed Central journal article supplement (PMC1815249)

**A**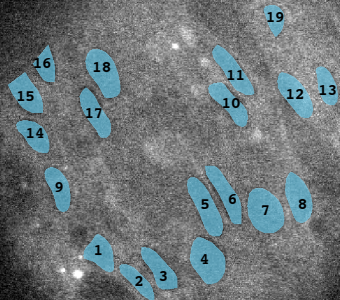

54hpf

**B**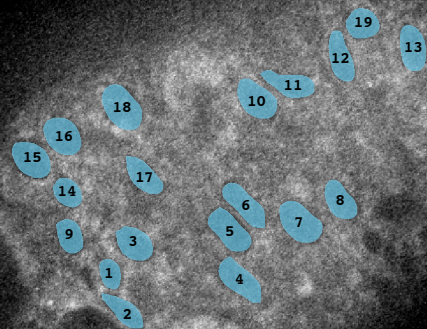

58,66hpf

**C**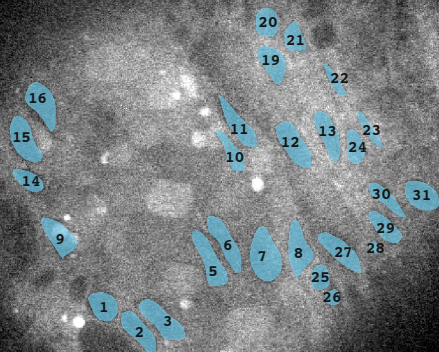

54hpf

**D**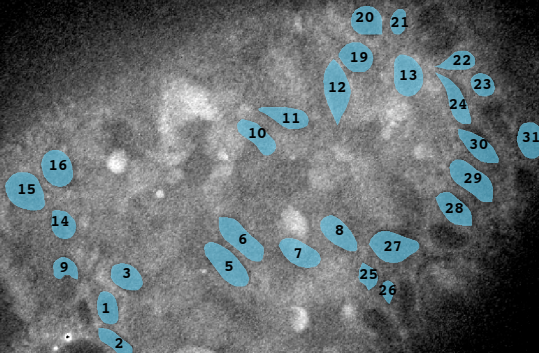

58,66hpf

Supplement: pnas_0606589104_5.pdf [file pnas_0606589104_5.pdf]
